# Supplementary material for: Protocol for fever control using external cooling in mechanically ventilated patients with septic shock: SEPSISCOOL II randomised controlled trial
Source: HighWire-hosted journal article supplement (doi:10.1136/bmjopen-2022-069430), 2024-01-01
Supplement: bmjopen-2022-069430supp001_data_supplement.pdf [file bmjopen-2022-069430supp001_data_supplement.pdf]

## SUPPLEMENTARY MATERIAL 1

### SPIRIT 2013 Checklist

| Section/item                      | Item No | Description                                                                                                  | Addressed on section or page number                      |
|-----------------------------------|---------|--------------------------------------------------------------------------------------------------------------|----------------------------------------------------------|
| <b>Administrative information</b> |         |                                                                                                              |                                                          |
| Title                             | 1       | Descriptive title identifying the study design, population, interventions, and, if applicable, trial acronym | 1                                                        |
| Trial registration                | 2a      | Trial identifier and registry name. If not yet registered, name of intended registry                         | Section Abstract                                         |
|                                   | 2b      | All items from the World Health Organization Trial Registration Data Set                                     | Suppl Material 2                                         |
| Protocol version                  | 3       | Date and version identifier                                                                                  | Section Footnotes, subsection Roles and responsibilities |
| Funding                           | 4       | Sources and types of financial, material, and other support                                                  | Section Fundings                                         |
| Roles and responsibilities        | and 5a  | Names, affiliations, and roles of protocol contributors                                                      | 1 + Section Footnotes, subsection Contributors           |
|                                   | 5b      | Name and contact information for the trial sponsor                                                           | Section Data availability statement                      |

|                      |        |                                                                                                                                                                                                                                                                                          |                                                          |
|----------------------|--------|------------------------------------------------------------------------------------------------------------------------------------------------------------------------------------------------------------------------------------------------------------------------------------------|----------------------------------------------------------|
|                      | 5c     | Role of study sponsor and funders, if any, in study design; collection, management, analysis, and interpretation of data; writing of the report; and the decision to submit the report for publication, including whether they will have ultimate authority over any of these activities | Section Footnotes, subsection Roles and responsibilities |
|                      | 5d     | Composition, roles, and responsibilities of the coordinating centre, steering committee, endpoint adjudication committee, data management team, and other individuals or groups overseeing the trial, if applicable (see Item 21a for data monitoring committee)                         | Section Footnotes, subsection Roles and responsibilities |
| <b>Introduction</b>  |        |                                                                                                                                                                                                                                                                                          |                                                          |
| Background rationale | and 6a | Description of research question and justification for undertaking the trial, including summary of relevant studies (published and unpublished) examining benefits and harms for each intervention                                                                                       | Section Background and rationale                         |
|                      | 6b     | Explanation for choice of comparators                                                                                                                                                                                                                                                    | Section Background and rationale                         |
| Objectives           | 7      | Specific objectives or hypotheses                                                                                                                                                                                                                                                        | Section Objectives and outcomes                          |
| Trial design         | 8      | Description of trial design including type of trial (eg, parallel group, crossover, factorial, single group), allocation ratio, and framework (eg, superiority, equivalence, noninferiority, exploratory)                                                                                | Section Study design                                     |

**Methods: Participants, interventions, and outcomes**

|                      |     |                                                                                                                                                                                                                                                                                                                                                                                |                                                                                        |
|----------------------|-----|--------------------------------------------------------------------------------------------------------------------------------------------------------------------------------------------------------------------------------------------------------------------------------------------------------------------------------------------------------------------------------|----------------------------------------------------------------------------------------|
| Study setting        | 9   | Description of study settings (eg, community clinic, academic hospital) and list of countries where data will be collected. Reference to where list of study sites can be obtained                                                                                                                                                                                             | Section Data Collection, subsection Method and timing + Suppl Material 3               |
| Eligibility criteria | 10  | Inclusion and exclusion criteria for participants. If applicable, eligibility criteria for study centres and individuals who will perform the interventions (eg, surgeons, psychotherapists)                                                                                                                                                                                   | Section Methods and analysis Subsection Eligibility Criteria + Subsection Intervention |
| Interventions        | 11a | Interventions for each group with sufficient detail to allow replication, including how and when they will be administered                                                                                                                                                                                                                                                     | Section Intervention subsection Fever management                                       |
|                      | 11b | Criteria for discontinuing or modifying allocated interventions for a given trial participant (eg, drug dose change in response to harms, participant request, or improving/worsening disease)                                                                                                                                                                                 | Section Intervention subsection Fever management                                       |
|                      | 11c | Strategies to improve adherence to intervention protocols, and any procedures for monitoring adherence (eg, drug tablet return, laboratory tests)                                                                                                                                                                                                                              | Section Data collection, subsection Method and timing                                  |
|                      | 11d | Relevant concomitant care and interventions that are permitted or prohibited during the trial                                                                                                                                                                                                                                                                                  | Section Intervention                                                                   |
| Outcomes             | 12  | Primary, secondary, and other outcomes, including the specific measurement variable (eg, systolic blood pressure), analysis metric (eg, change from baseline, final value, time to event), method of aggregation (eg, median, proportion), and time point for each outcome. Explanation of the clinical relevance of chosen efficacy and harm outcomes is strongly recommended | Section Objectives and outcomes                                                        |

|                      |    |                                                                                                                                                                                       |                                                                                            |
|----------------------|----|---------------------------------------------------------------------------------------------------------------------------------------------------------------------------------------|--------------------------------------------------------------------------------------------|
| Participant timeline | 13 | Time schedule of enrolment, interventions (including any run-ins and washouts), assessments, and visits for participants. A schematic diagram is highly recommended (see Figure)      | Section Method and timing + Table 2                                                        |
| Sample size          | 14 | Estimated number of participants needed to achieve study objectives and how it was determined, including clinical and statistical assumptions supporting any sample size calculations | Section Sample size calculation                                                            |
| Recruitment          | 15 | Strategies for achieving adequate participant enrolment to reach target sample size                                                                                                   | Section Randomization + Section Interim analyses + Section Footnotes subsection Newsletter |

### Methods: Assignment of interventions (for controlled trials)

#### Allocation:

|                                  |     |                                                                                                                                                                                                                                                                                                                                                          |                       |
|----------------------------------|-----|----------------------------------------------------------------------------------------------------------------------------------------------------------------------------------------------------------------------------------------------------------------------------------------------------------------------------------------------------------|-----------------------|
| Sequence generation              | 16a | Method of generating the allocation sequence (eg, computer-generated random numbers), and list of any factors for stratification. To reduce predictability of a random sequence, details of any planned restriction (eg, blocking) should be provided in a separate document that is unavailable to those who enrol participants or assign interventions | Section Randomization |
| Allocation concealment mechanism | 16b | Mechanism of implementing the allocation sequence (eg, central telephone; sequentially numbered, opaque, sealed envelopes), describing any steps to conceal the sequence until interventions are assigned                                                                                                                                                | NA                    |
| Implementation                   | 16c | Who will generate the allocation sequence, who will enrol participants, and who will assign participants to interventions                                                                                                                                                                                                                                | Section Randomization |

|                    |     |                                                                                                                                                      |    |
|--------------------|-----|------------------------------------------------------------------------------------------------------------------------------------------------------|----|
| Blinding (masking) | 17a | Who will be blinded after assignment to interventions (eg, trial participants, care providers, outcome assessors, data analysts), and how            | NA |
|                    | 17b | If blinded, circumstances under which unblinding is permissible, and procedure for revealing a participant's allocated intervention during the trial | NA |

**Methods: Data collection, management, and analysis**

|                         |     |                                                                                                                                                                                                                                                                                                                                                                                                              |                                                                                                            |
|-------------------------|-----|--------------------------------------------------------------------------------------------------------------------------------------------------------------------------------------------------------------------------------------------------------------------------------------------------------------------------------------------------------------------------------------------------------------|------------------------------------------------------------------------------------------------------------|
| Data collection methods | 18a | Plans for assessment and collection of outcome, baseline, and other trial data, including any related processes to promote data quality (eg, duplicate measurements, training of assessors) and a description of study instruments (eg, questionnaires, laboratory tests) along with their reliability and validity, if known. Reference to where data collection forms can be found, if not in the protocol | Section Data collection + subsection Method and timing + subsection Quality control                        |
|                         | 18b | Plans to promote participant retention and complete follow-up, including list of any outcome data to be collected for participants who discontinue or deviate from intervention protocols                                                                                                                                                                                                                    | Section Data collection + subsection Method and timing + subsection Quality control + Section Intervention |
| Data management         | 19  | Plans for data entry, coding, security, and storage, including any related processes to promote data quality (eg, double data entry; range checks for data values). Reference to where details of data management procedures can be found, if not in the protocol                                                                                                                                            | Section Data collection + subsection Method and timing + subsection Quality control                        |
| Statistical methods     | 20a | Statistical methods for analysing primary and secondary outcomes. Reference to where other details of the statistical analysis plan can be found, if not in the protocol                                                                                                                                                                                                                                     | Section Statistical methods                                                                                |

|     |                                                                                                                                                                                 |                                                                                                                     |
|-----|---------------------------------------------------------------------------------------------------------------------------------------------------------------------------------|---------------------------------------------------------------------------------------------------------------------|
| 20b | Methods for any additional analyses (eg, subgroup and adjusted analyses)                                                                                                        | Section Statistical methods, subsection Pre-planned subgroup analysis                                               |
| 20c | Definition of analysis population relating to protocol non-adherence (eg, as randomised analysis), and any statistical methods to handle missing data (eg, multiple imputation) | Section Statistical subsections Compliance - ...) + Section Statistical methods, subsection Missing data management |

### Methods: Monitoring

|                 |     |                                                                                                                                                                                                                                                                                                                                       |                                                                                                                                                                    |
|-----------------|-----|---------------------------------------------------------------------------------------------------------------------------------------------------------------------------------------------------------------------------------------------------------------------------------------------------------------------------------------|--------------------------------------------------------------------------------------------------------------------------------------------------------------------|
| Data monitoring | 21a | Composition of data monitoring committee (DMC); summary of its role and reporting structure; statement of whether it is independent from the sponsor and competing interests; and reference to where further details about its charter can be found, if not in the protocol. Alternatively, an explanation of why a DMC is not needed | Section Data Monitoring, subsection DMC + Section Statistical analyses, subsection Interim analyses; DMC charter v1-0 December 23 <sup>th</sup> , 2020 (in French) |
|                 | 21b | Description of any interim analyses and stopping guidelines, including who will have access to these interim results and make the final decision to terminate the trial                                                                                                                                                               | Section Statistical analyses, subsection Interim analyses; DMC charter v1-0 December 23 <sup>th</sup> , 2020 (in French)                                           |

|                                 |     |                                                                                                                                                                                                                                  |                                                               |
|---------------------------------|-----|----------------------------------------------------------------------------------------------------------------------------------------------------------------------------------------------------------------------------------|---------------------------------------------------------------|
| Harms                           | 22  | Plans for collecting, assessing, reporting, and managing solicited and spontaneously reported adverse events and other unintended effects of trial interventions or trial conduct                                                | Section Data monitoring, subsection Monitoring adverse events |
| Auditing                        | 23  | Frequency and procedures for auditing trial conduct, if any, and whether the process will be independent from investigators and the sponsor                                                                                      | NA                                                            |
| <b>Ethics and dissemination</b> |     |                                                                                                                                                                                                                                  |                                                               |
| Research ethics approval        | 24  | Plans for seeking research ethics committee/institutional review board (REC/IRB) approval                                                                                                                                        | Section Ethics                                                |
| Protocol amendments             | 25  | Plans for communicating important protocol modifications (eg, changes to eligibility criteria, outcomes, analyses) to relevant parties (eg, investigators, REC/IRBs, trial participants, trial registries, journals, regulators) | Section Ethics                                                |
| Consent or assent               | 26a | Who will obtain informed consent or assent from potential trial participants or authorised surrogates, and how (see Item 32)                                                                                                     | Section Ethics                                                |
|                                 | 26b | Additional consent provisions for collection and use of participant data and biological specimens in ancillary studies, if applicable                                                                                            | NA                                                            |
| Confidentiality                 | 27  | How personal information about potential and enrolled participants will be collected, shared, and maintained in order to protect confidentiality before, during, and after the trial                                             | Section Ethics                                                |
| Declaration of interests        | 28  | Financial and other competing interests for principal investigators for the overall trial and each study site                                                                                                                    | Section Footnotes, subsection Competing interests             |

|                               |     |                                                                                                                                                                                                                                                                                     |                                     |
|-------------------------------|-----|-------------------------------------------------------------------------------------------------------------------------------------------------------------------------------------------------------------------------------------------------------------------------------------|-------------------------------------|
| Access to data                | 29  | Statement of who will have access to the final trial dataset, and disclosure of contractual agreements that limit such access for investigators                                                                                                                                     | Section Data availability statement |
| Ancillary and post-trial care | 30  | Provisions, if any, for ancillary and post-trial care, and for compensation to those who suffer harm from trial participation                                                                                                                                                       | NA                                  |
| Dissemination policy          | 31a | Plans for investigators and sponsor to communicate trial results to participants, healthcare professionals, the public, and other relevant groups (eg, via publication, reporting in results databases, or other data sharing arrangements), including any publication restrictions | Section Dissemination               |
|                               | 31b | Authorship eligibility guidelines and any intended use of professional writers                                                                                                                                                                                                      | Section Dissemination               |
|                               | 31c | Plans, if any, for granting public access to the full protocol, participant-level dataset, and statistical code                                                                                                                                                                     | Section Data availability statement |
| <b>Appendices</b>             |     |                                                                                                                                                                                                                                                                                     |                                     |
| Informed consent materials    | 32  | Model consent form and other related documentation given to participants and authorised surrogates                                                                                                                                                                                  | Separate documents                  |
| Biological specimens          | 33  | Plans for collection, laboratory evaluation, and storage of biological specimens for genetic or molecular analysis in the current trial and for future use in ancillary studies, if applicable                                                                                      | NA                                  |



## SUPPLEMENTARY MATERIAL 2

### WHO Trial Registration Data Set (Version 1.3.1):

- 1) Primary Registry and Trial Identifying Number: RCB N°2020-A3201-38
- 2) Date of Registration in Primary Registry: July 28<sup>th</sup>, 2020.
- 3) Secondary Identifying Numbers: NCT04494074; PHRC-19-0046.
- 4) Source(s) of Monetary or Material Support: the French National “Programme Hospitalier de Recherche Clinique 2019”.
- 5) Primary Sponsor: clinical research unit of the Centre Hospitalier Intercommunal de Créteil.
- 6) Secondary Sponsor(s): NA.
- 7) Contact for Public Queries: AA (see page 1).
- 8) Contact for Scientific Queries: AA (see page 1).
- 9)-10) Public-Scientific Title: Protocol for Fever Control Using External Cooling in Mechanically Ventilated Patients with Septic Shock: SEPSISCOOL II Randomised Controlled Trial.
- 11) Countries of Recruitment: France
- 12) Health Condition(s) or Problem(s) Studied: febrile patients with septic shock in ICU.
- 13) Intervention(s): Routinely applied, external cooling (intervention) or no-cooling (control) strategy for fever management during the first 48 hours following randomisation.
- 14) Key Inclusion and Exclusion Criteria: Inclusion criteria: Documented or suspected infection, either community or hospital acquired; Ongoing antimicrobial treatment and/or intervention for infection source control (e.g., surgical drainage); Septic shock; Patients under invasive mechanical ventilation; Core body temperature > 38.3°C; Intravenous sedation or opioids; Attending physician confirms clinical equipoise without substantial risk if the patient participates in the trial. Exclusion criteria: Cardiac arrest within previous 7 days; Acute brain injury within previous 7 days; Extensive burns or epidermal necrolysis; Core body temperature  $\geq$  41°C; pregnancy; Participation in another interventional study with mortality as the primary endpoint; investigator’s decision not to resuscitate
- 15) Study Type: interventional randomized open-label controlled parallel group phase IV trial. Covariate-balance adaptive allocation.
- 16) Date of First Enrolment: October 12<sup>th</sup>, 2022.
- 17) Sample Size: Planned to enrol 820 participants. Currently enrolled: 25 participants (April 28<sup>th</sup>, 2023).
- 18) Recruitment Status: Recruiting.
- 19) Primary Outcome(s): Mortality at day 60 after randomisation.
- 20) Key Secondary Outcomes: evolution of organ failure on day 28; evolution of Sequential Organ Failure Assessment score at day 28; acute kidney injury up to day 7, criteria to initiate renal replacement therapy (RRT) and to start new RRT up to day 28; ARDS acquired after randomisation up to day 3.; mortality at day 28; incidence of secondary ICU-acquired nosocomial infections through day 28; tolerance of the two strategies up to day 90.
- 21) Ethics Review: Approved Februray 4<sup>th</sup>, 2021 by the French Comité de Protection des Personnes Nord Ouest II (Amiens, France).
- 22) Completion date: NA.
- 23) Summary Results: NA.
- 24) IPD sharing statement: upon request to the sponsor.

### SUPPLEMENTARY MATERIAL 3

#### Centres list

| Trial centres                                      | Name of PI                    | E-mail of PI                                                                                   | Address                                                         |
|----------------------------------------------------|-------------------------------|------------------------------------------------------------------------------------------------|-----------------------------------------------------------------|
| CHI Créteil,<br>Medical ICU                        | Frédérique<br>SCHORTGEN       | <a href="mailto:Frederique.schortgen@chicreteil.fr">Frederique.schortgen@chicreteil.fr</a>     | 40 avenue de Verdun<br>94000 Créteil                            |
| CHU Rouen,<br>Medical ICU                          | Dorothée<br>CARPENTIER        | <a href="mailto:dorothee.carpentier@chu-rouen.fr">dorothee.carpentier@chu-rouen.fr</a>         | 1 rue Germont<br>76031 Rouen                                    |
| CH Le Mans,<br>Medical ICU                         | Christophe<br>GUITTON         | <a href="mailto:cguittou@ch-lemans.fr">cguittou@ch-lemans.fr</a>                               | 194 avenue Rubillard<br>72000 Le Mans                           |
| CHU Angers,<br>Medical ICU                         | Pierre ASFAR                  | <a href="mailto:PiAsfar@chu-angers.fr">PiAsfar@chu-angers.fr</a>                               | 4 Rue Larrey<br>49933 Angers                                    |
| CHU Nantes,<br>Medical ICU                         | Jean Baptiste<br>LASCARROU    | <a href="mailto:jeanbaptiste.lascarrou@chu-nantes.fr">jeanbaptiste.lascarrou@chu-nantes.fr</a> | 1 place Alexis Ricordeau<br>44093 Nantes                        |
| CHU Nice,<br>Medical ICU                           | Clément<br>SACCHERI           | <a href="mailto:saccheri.c@chu-nice.fr">saccheri.c@chu-nice.fr</a>                             | 151 Route St Antoine<br>Ginestière 06202 Nice                   |
| APHP, Hôpital<br>Lariboisière,<br>Medical ICU      | Nicolas DEYE                  | <a href="mailto:Nicolas.deye@aphp.fr">Nicolas.deye@aphp.fr</a>                                 | 2 rue Ambroise Paré<br>75010 Paris                              |
| Hopital Foch,<br>Medical ICU                       | Jérôme<br>DEVAQUET            | <a href="mailto:j.devaquet@hopital-foch.org">j.devaquet@hopital-foch.org</a>                   | 40 rue Worth<br>92150 Suresnes                                  |
| APHP,<br>Mondor,<br>Medical ICU                    | Armand<br>MEKONTSO-<br>DESSAP | <a href="mailto:armand.dessap@aphp.fr">armand.dessap@aphp.fr</a>                               | 51 Avenue du Maréchal<br>de Lattre de Tassigny<br>94010 Créteil |
| CHU Amiens,<br>Medical ICU                         | Julien MAIZEL                 | <a href="mailto:maizel.Julien@chu-amiens.fr">maizel.Julien@chu-amiens.fr</a>                   | Avenue Professeur Cabrol<br>80054 Amiens Cedex                  |
| CHD Vendée,<br>la Roche sur<br>Yon, Medical<br>ICU | Jean Claude<br>LACHERADE      | <a href="mailto:jean-claude.lacherade@chd-vendee.fr">jean-claude.lacherade@chd-vendee.fr</a>   | Boulevard Stéphane<br>Moreau<br>85925 La Roche sur Yon          |
| CHU Dijon,<br>Medical ICU                          | Jean Pierre<br>QUENOT         | <a href="mailto:jean-pierre.quenot@chu-dijon.fr">jean-pierre.quenot@chu-dijon.fr</a>           | 14 rue Paul Gaffarel<br>21079 Dijon                             |

|                                                         |                          |                                                                                                        |                                                             |
|---------------------------------------------------------|--------------------------|--------------------------------------------------------------------------------------------------------|-------------------------------------------------------------|
| APHM, Hôpital de la Timone, Department of Emergency ICU | Jeremy BOURENNE          | <a href="mailto:Jeremy.bourenne@ap-hm.fr">Jeremy.bourenne@ap-hm.fr</a>                                 | 264 rue Saint Pierre<br>13005 Marseille                     |
| G.H.R. Mulhouse Sud Alsace, Medical ICU                 | Anne-Florence Dureau     | <a href="mailto:anne-florence.dureau@ghrmsa.fr">anne-florence.dureau@ghrmsa.fr</a>                     | 20 avenue du Docteur René Laennec 68100 Mulhouse            |
| CH Versailles, Medical ICU                              | Stéphane Legriel         | <a href="mailto:slegriel@ch-versailles.fr">slegriel@ch-versailles.fr</a>                               | 177 rue de Versailles<br>78150 Le Chesnay                   |
| APHP, CHU Bicetre, Medical ICU                          | Nadia ANGUEL             | <a href="mailto:nadia.anguel@aphp.fr">nadia.anguel@aphp.fr</a>                                         | 78 rue du Général Leclerc<br>94270 Le Kremlin Bicêtre       |
| CH Victor Dupouy Argenteuil, ICU                        | Gaetan PLANTEFEVE        | <a href="mailto:gaetan.plantefeve@ch-argenteuil.fr">gaetan.plantefeve@ch-argenteuil.fr</a>             | 69 rue du Lieutenant Colonel Prudhon 95100 Argenteuil       |
| Hôpital nord Franche Comté, Medical ICU                 | Julio BADIE              | <a href="mailto:Julio.BADIE@hnfc.fr">Julio.BADIE@hnfc.fr</a>                                           | 100 route de Moval<br>90015 Belfort Cedex                   |
| CH Libourne, Medical ICU                                | Caroline JANNIERE-NARTEY | <a href="mailto:caroline.janniere-nartey@ch-libourne.fr">caroline.janniere-nartey@ch-libourne.fr</a>   | 112 rue de la Marne<br>33505 Libourne                       |
| CHU Reims, Medical ICU                                  | Bruno MOURVILLIER        | <a href="mailto:bmourvillier@chu-reims.fr">bmourvillier@chu-reims.fr</a>                               | Rue du Général Koenig<br>51100 Reims                        |
| APHP, Hôpital Lariboisière, surgical ICU                | Benjamin CHOUSTERMAN     | <a href="mailto:benjamin.chousterman@aphp.fr">benjamin.chousterman@aphp.fr</a>                         | 2 rue Ambroise Paré<br>75010 Paris                          |
| GH Est Francilien (Marne la vallée), Medical ICU        | Ly Van Phach VONG        | <a href="mailto:lvpvong@ghcf.fr">lvpvong@ghcf.fr</a>                                                   | 2-4 Cours de la Gondoire<br>77600 Jossigny                  |
| CHBA Vannes, Medical and surgical ICU                   | Agathe DELBOVE           | <a href="mailto:agathe.delbove@ch-bretagne-atlantique.fr">agathe.delbove@ch-bretagne-atlantique.fr</a> | 20, boulevard du général Maurice Guillaudot<br>56000 Vannes |

|                                                           |                            |                                                                                        |                                                    |
|-----------------------------------------------------------|----------------------------|----------------------------------------------------------------------------------------|----------------------------------------------------|
| CH de<br>TARBES,<br>Medical ICU                           | Philippe PETUA             | <a href="mailto:ppetua@ch-tarbes-vic.fr">ppetua@ch-tarbes-vic.fr</a>                   | Boulevard de Lattre de<br>Tassigny<br>65013 Tarbes |
| GH Nord,<br>Hôpital de la<br>Croix-Rousse,<br>Medical ICU | Jean-Christophe<br>RICHARD | <a href="mailto:j-christophe.richard@chu-lyon.fr">j-christophe.richard@chu-lyon.fr</a> | 103 grande Rue de la<br>Croix-Rousse<br>69004 Lyon |
| CH Cholet,<br>Medical ICU                                 | Julien<br>DUPEYRAT         | <a href="mailto:julien.dupeyrat@ch-cholet.fr">julien.dupeyrat@ch-cholet.fr</a>         | 1 rue Marengo<br>49300 Cholet                      |
| CHU<br>Michallon,<br>Medical ICU                          | Guillaume<br>DUMAS         | <a href="mailto:dumas.guillaume1@gmail.com">dumas.guillaume1@gmail.com</a>             | Bd de la Chantourne<br>38700 La Tronche            |
| CHU Pasteur<br>2, Medical<br>ICU                          | Alexandre<br>ROBERT        | <a href="mailto:robert.a@chu-nice.fr">robert.a@chu-nice.fr</a>                         | 30 voie Romaine<br>06001 Nice                      |

## SUPPLEMENTARY MATERIAL 4

## Schedule of enrolment, interventions and data collection

| Intervention                                                                                                     | Inclusion | Pre-randomisation | Randomisation | Hours from randomisation |    |       |    |       |    | Days from randomisation |    |    |  |
|------------------------------------------------------------------------------------------------------------------|-----------|-------------------|---------------|--------------------------|----|-------|----|-------|----|-------------------------|----|----|--|
|                                                                                                                  |           |                   |               | 0-24                     | 24 | 24-48 | 48 | 48-72 | 72 | 7                       | 28 | 60 |  |
| Informed consent                                                                                                 |           |                   |               |                          |    |       |    |       |    |                         |    |    |  |
| Eligibility criteria                                                                                             | X         |                   |               |                          |    |       |    |       |    |                         |    |    |  |
| Variables for stratification and randomisation                                                                   |           |                   | X             |                          |    |       |    |       |    |                         |    |    |  |
| Allocation                                                                                                       |           |                   | X             |                          |    |       |    |       |    |                         |    |    |  |
| Baseline characteristics, comorbidities, infection, severity score, organ supports, delay from vasopressor start |           | X                 |               |                          |    |       |    |       |    |                         |    |    |  |
| Study treatment                                                                                                  |           |                   |               |                          |    |       |    |       |    |                         |    |    |  |
| Vital signs, vasopressor dose, RASS                                                                              |           |                   | X             | X                        | X  | X     | X  | X     | X  |                         |    |    |  |
| Biological analyses: arterial blood gases, lactate, creatinine                                                   |           |                   |               |                          | X  |       | X  |       | X  |                         |    |    |  |
| Safety events: shivering, skin lesions, seizure, new cardiac arrhythmias, secondary acquired ARDS                |           |                   |               | X                        | X  | X     | X  | X     | X  |                         |    |    |  |
| SOFA score                                                                                                       |           |                   |               |                          | X  |       | X  |       | X  | X                       |    |    |  |
| AKI                                                                                                              |           |                   |               |                          |    |       |    |       |    |                         |    |    |  |
| Organ support: vasopressors, mechanical ventilation, RRT                                                         |           |                   |               |                          |    |       |    |       |    |                         |    |    |  |
| ICU-acquired infection                                                                                           |           |                   |               |                          |    |       |    |       |    |                         |    |    |  |
| Vital status                                                                                                     |           |                   |               |                          |    |       |    |       |    |                         | X  | X  |  |

AKI, acute kidney injury; ARDS, acute respiratory distress syndrome; ICU, intensive care unit; RRT, renal replacement therapy; SOFA, Sequential Organ Failure Assessment. RASS: Richmond agitation sedation scale.

## SUPPLEMENTARY MATERIAL 5

### Definitions of nosocomial infections

Nosocomial infections are diagnosed by clinical teams after 48 hours of inclusion. NI are defined according to the ECDC criteria applied routinely in French surveillance systems (<https://www.ecdc.europa.eu/en/publications-data/surveillance-healthcare-associated-infections-and-prevention-indicators-european>). Recorded infections are ventilator acquired pneumonia (VAP), blood stream infection (BSI), catheter related blood stream infection, urinary tract infection (UTI) and surgical site infection.

VAP is defined in accordance with clinical criteria (X-ray, fever  $>38^{\circ}\text{C}$ , leucocytosis  $>12\,000$  white blood cells (WBC)/ $\text{mm}^3$ , purulent sputum) and microbiological confirmation among: 1- minimally contaminated lower respiratory tract sample with quantitative culture (104 colony-forming units (CFU)/ml for BAL, 103 CFU/ml for protected brush samples or distal protected aspirate); 2- non-protected sample (endotracheal aspirate, ETA) with quantitative culture (106 CFU/ml); 3- alternative microbiological criteria (e.g. positive blood culture, multiplex PCR test);

BSI is defined as a positive blood culture of a recognized pathogen or the combination of clinical symptoms (fever  $>38^{\circ}\text{C}$ , chills, hypotension) and two positive blood cultures of a common skin contaminant from two separate blood samples drawn within 48 hours.

UTI is defined as either a microbiologically confirmed symptomatic UTI with a positive urine culture  $\geq 10^5$  microorganisms per ml of urine requiring antibiotics

Venous catheter -related BSI was defined as a BSI occurring 48 hours before or after catheter removal, and a positive culture with the same microorganism of either a) quantitative CVC

culture  $\geq$  103 CFU/ml or differential delay of positivity of blood cultures, or positive culture with the same microorganism from pus from insertion site.

Surgical site infection within 30 days after surgery: deep incisional or organ.

## SUPPLEMENTARY MATERIAL 6

### Members of the independent endpoint adjudication committee:

Pr Claude Guerin: Medical ICU Hôpital Edouard Herriot, Lyon, Université de Lyon, and Institut Mondor de Recherches Biomédicales, INSERM 955, CNRS ERL 7000, Créteil, France

Pr Charles Edouard Luyt: Assistance Publique-Hôpitaux de Paris, Pitié-Salpêtrière Hospital, Medical Intensive Care Unit, Paris and Sorbonne Université, 27063, UPMC Univ Paris 06, INSERM, UMRS\_1166-ICAN, Institute of Cardiometabolism and Nutrition, Paris, France

Pr Alain Cariou: Assistance Publique-Hôpitaux de Paris, Medical Intensive Care Unit, Cochin University Hospital, Paris and Paris Cité University – Medical School, Paris, France

Dr Lucie Biard: Assistance Publique-Hôpitaux de Paris, Department of Biostatistics and Medical Information, Université Paris Cité, Saint-Louis Hospital, Paris and INSERM U1153 Team ECSTRRA, F-75010 Paris, France
